# Supplementary material for: Projecting Antarctica's contribution to future sea level rise from basal ice shelf melt using linear response functions of 16 ice sheet models (LARMIP-2)
Source: Copernicus journal article supplement (doi:10.5194/esd-11-35-2020), 2020-02-13
Supplement: Supplementary file 1 [file esd-11-35-2020-supplement.pdf]

Supplement of Earth Syst. Dynam., 11, 35–76, 2020  
<https://doi.org/10.5194/esd-11-35-2020-supplement>  
© Author(s) 2020. This work is distributed under  
the Creative Commons Attribution 4.0 License.

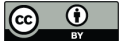

*Supplement of*

## **Projecting Antarctica's contribution to future sea level rise from basal ice shelf melt using linear response functions of 16 ice sheet models (LARMIP-2)**

**Anders Levermann et al.**

*Correspondence to:* Anders Levermann ([anders.levermann@pik-potsdam.de](mailto:anders.levermann@pik-potsdam.de))

The copyright of individual parts of the supplement might differ from the CC BY 4.0 License.

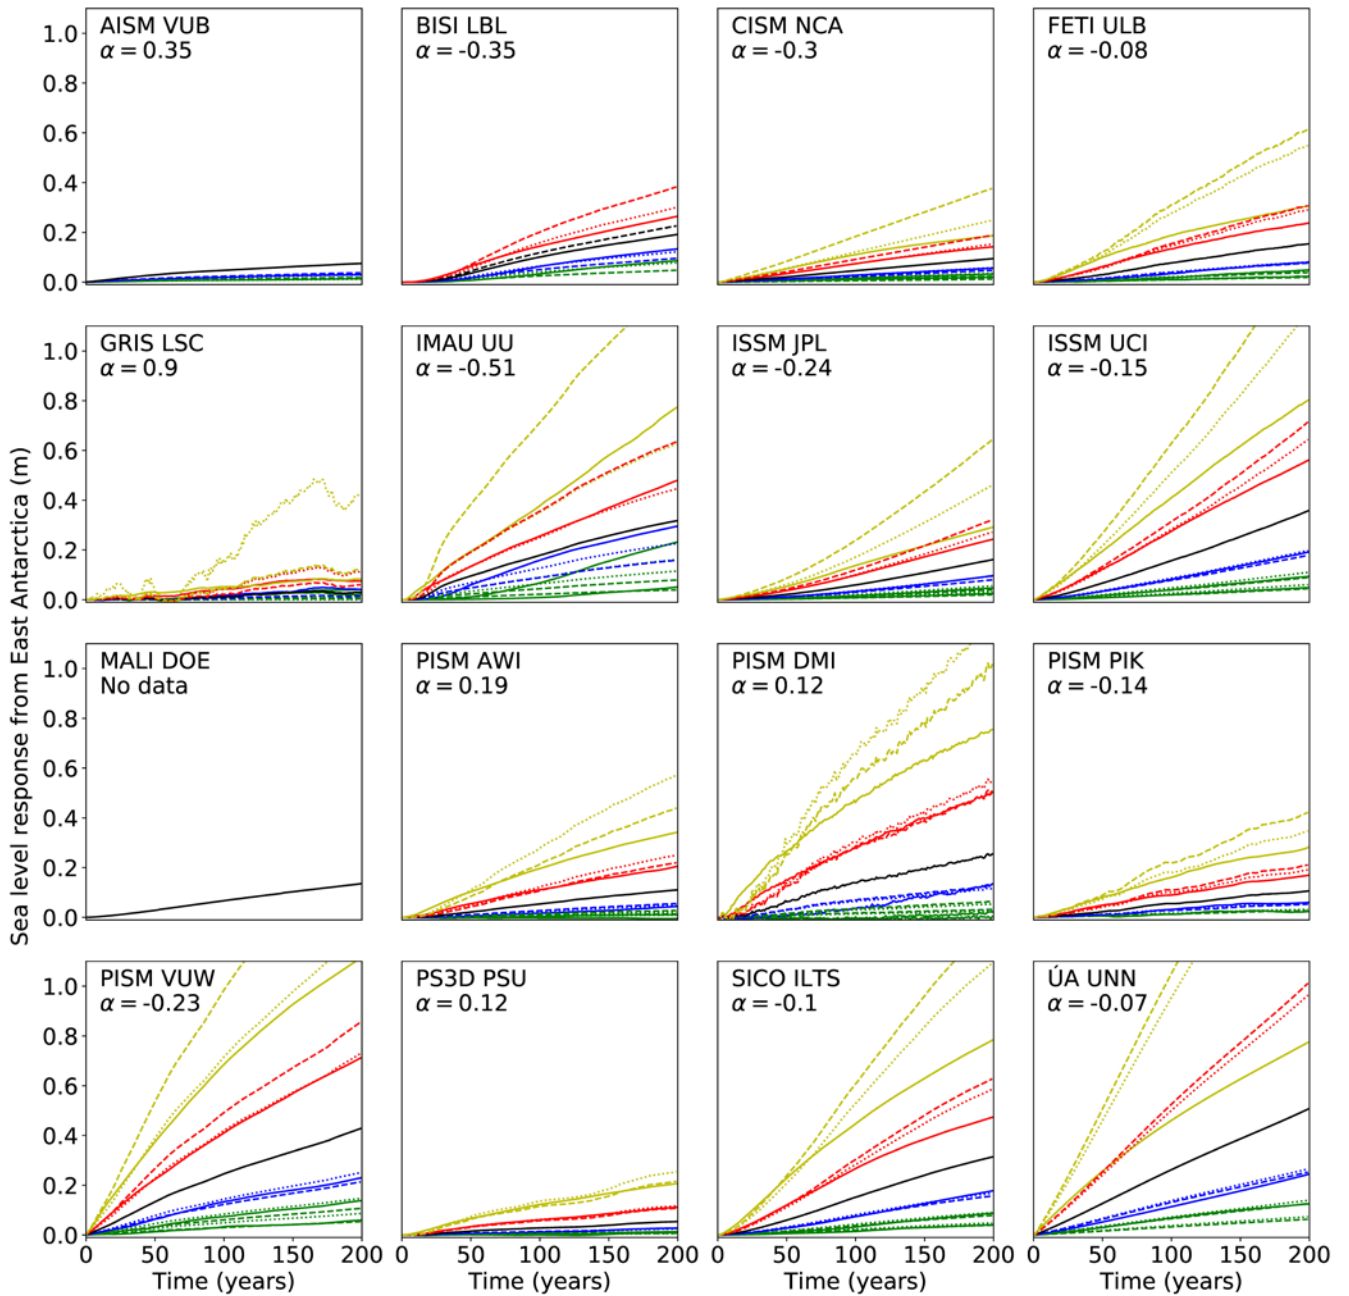

**Figure S1a: Linearity check for East Antarctica as in Figure 4 but including the simulations with 2 m/yr (green) and 32 m/yr (yellow) of additional basal melting.**

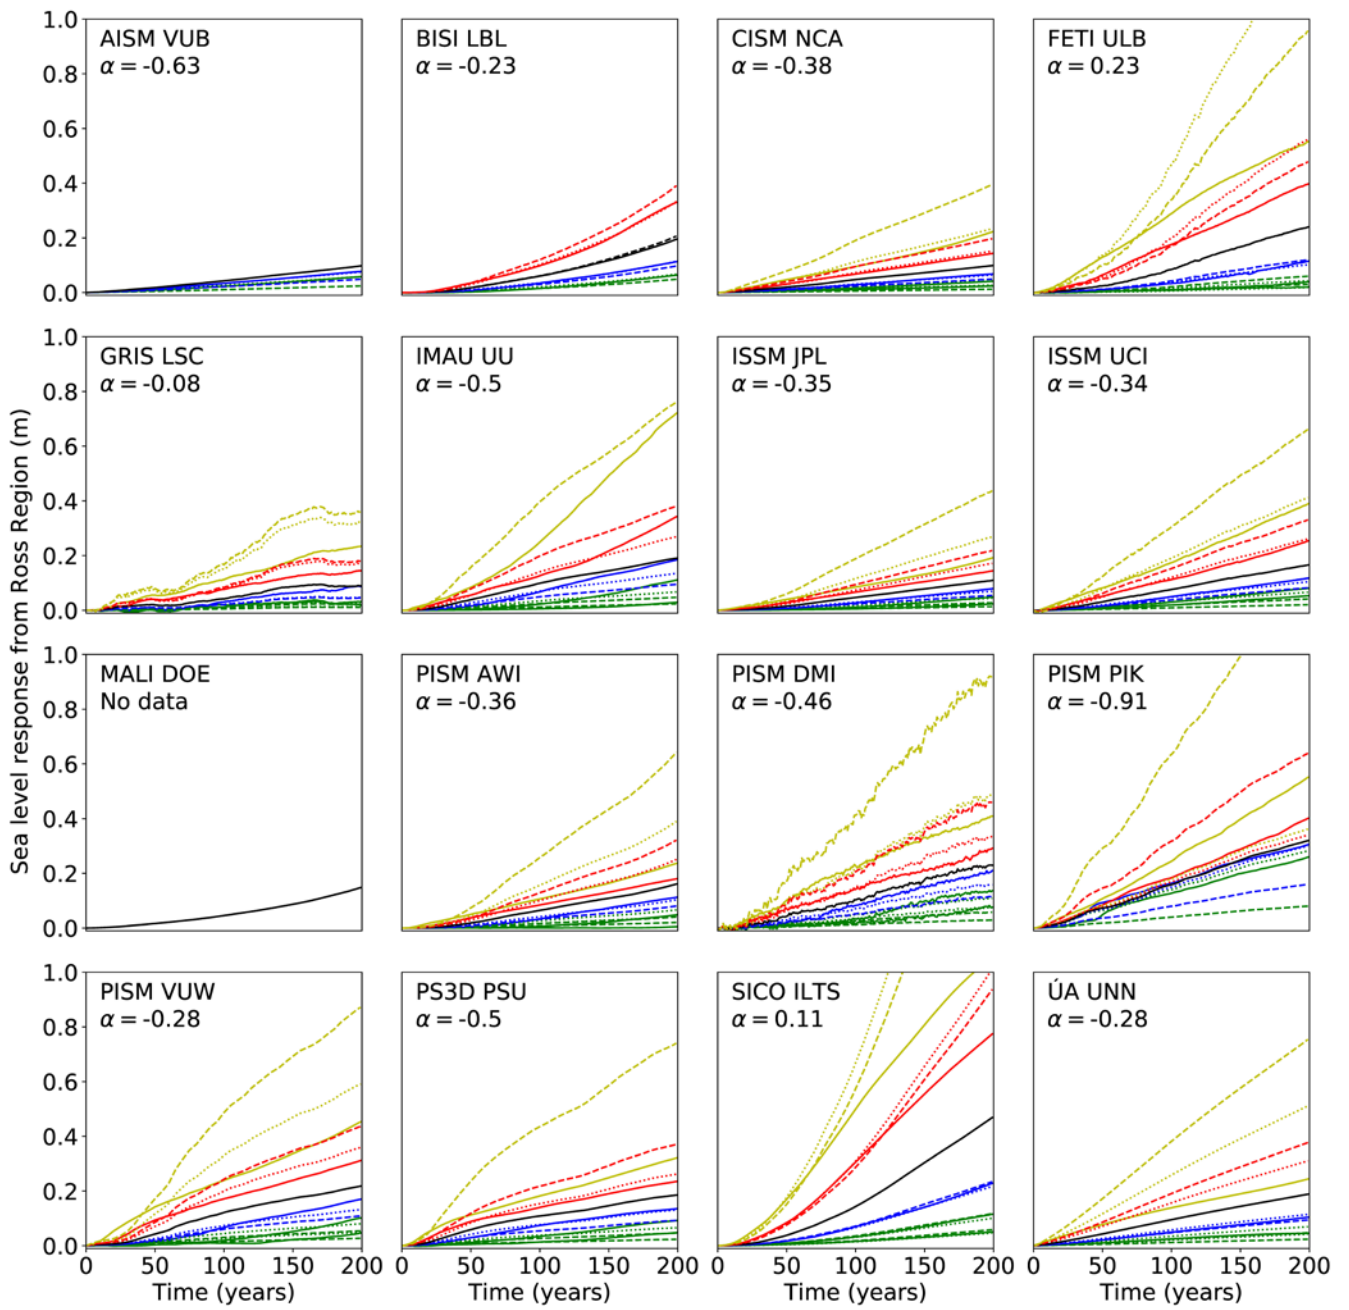

**Figure S1b: Linearity check for the Ross region** as in Figure S1a.

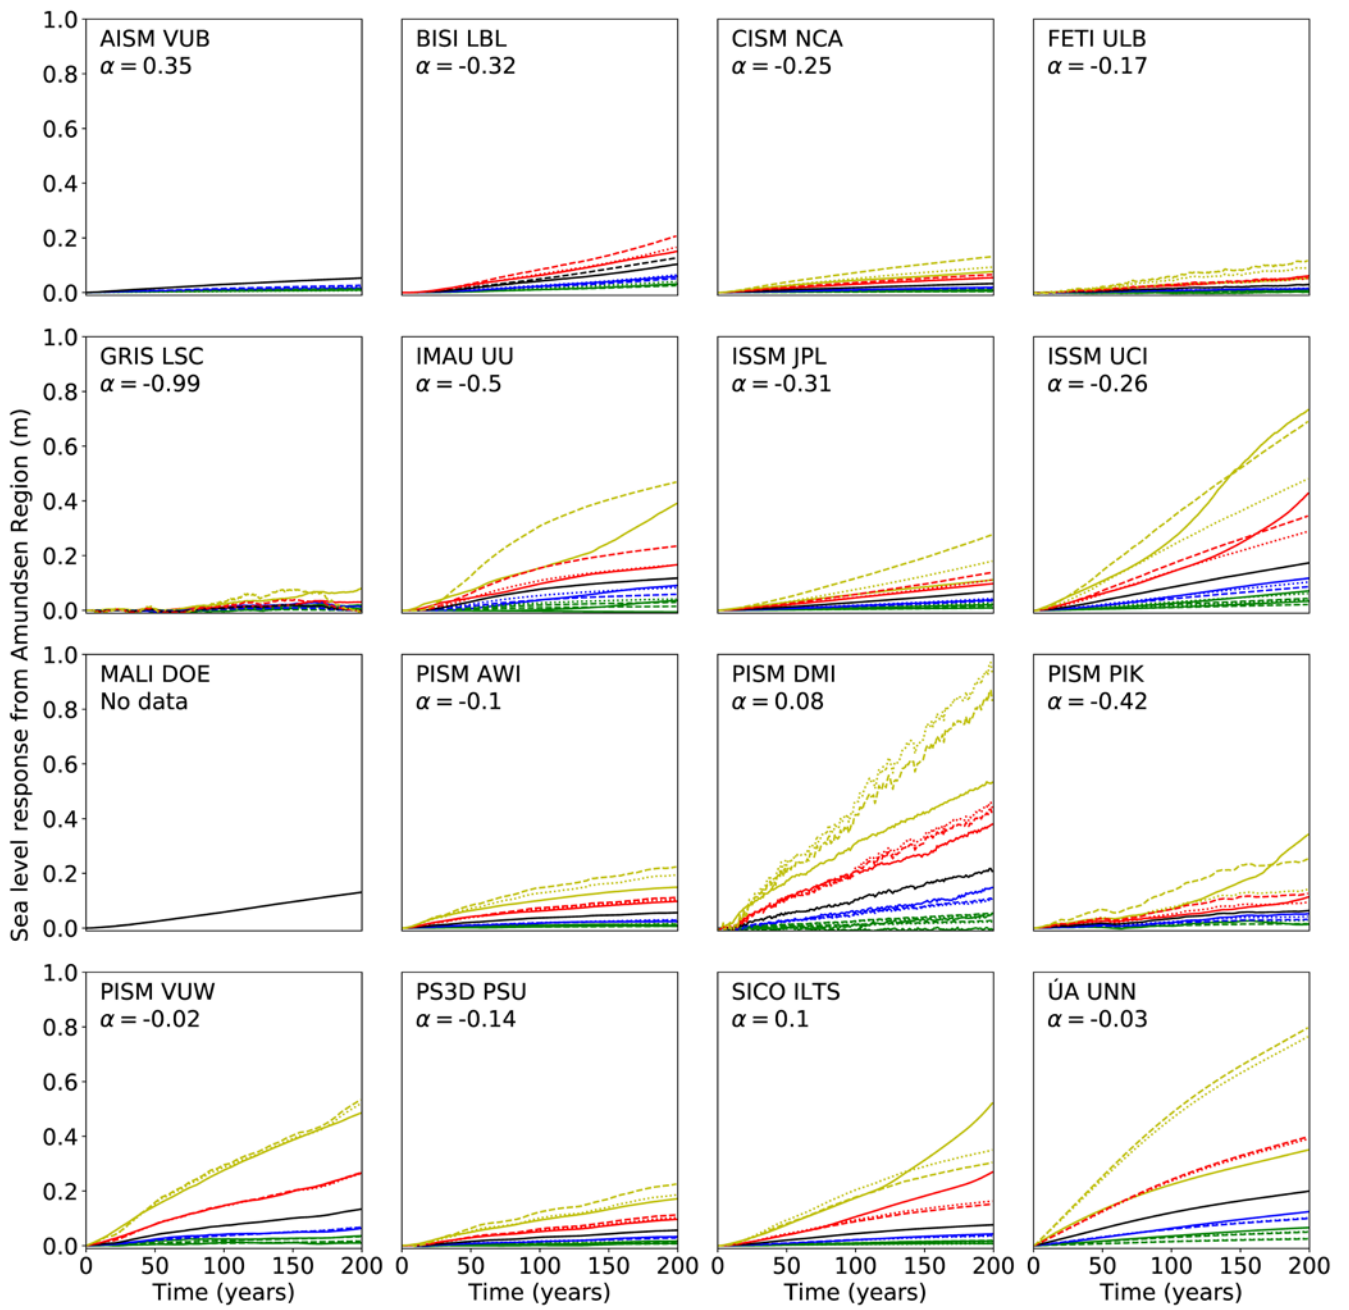

**Figure S1c: Linearity check for the Amundsen region** as in Figure S1a.

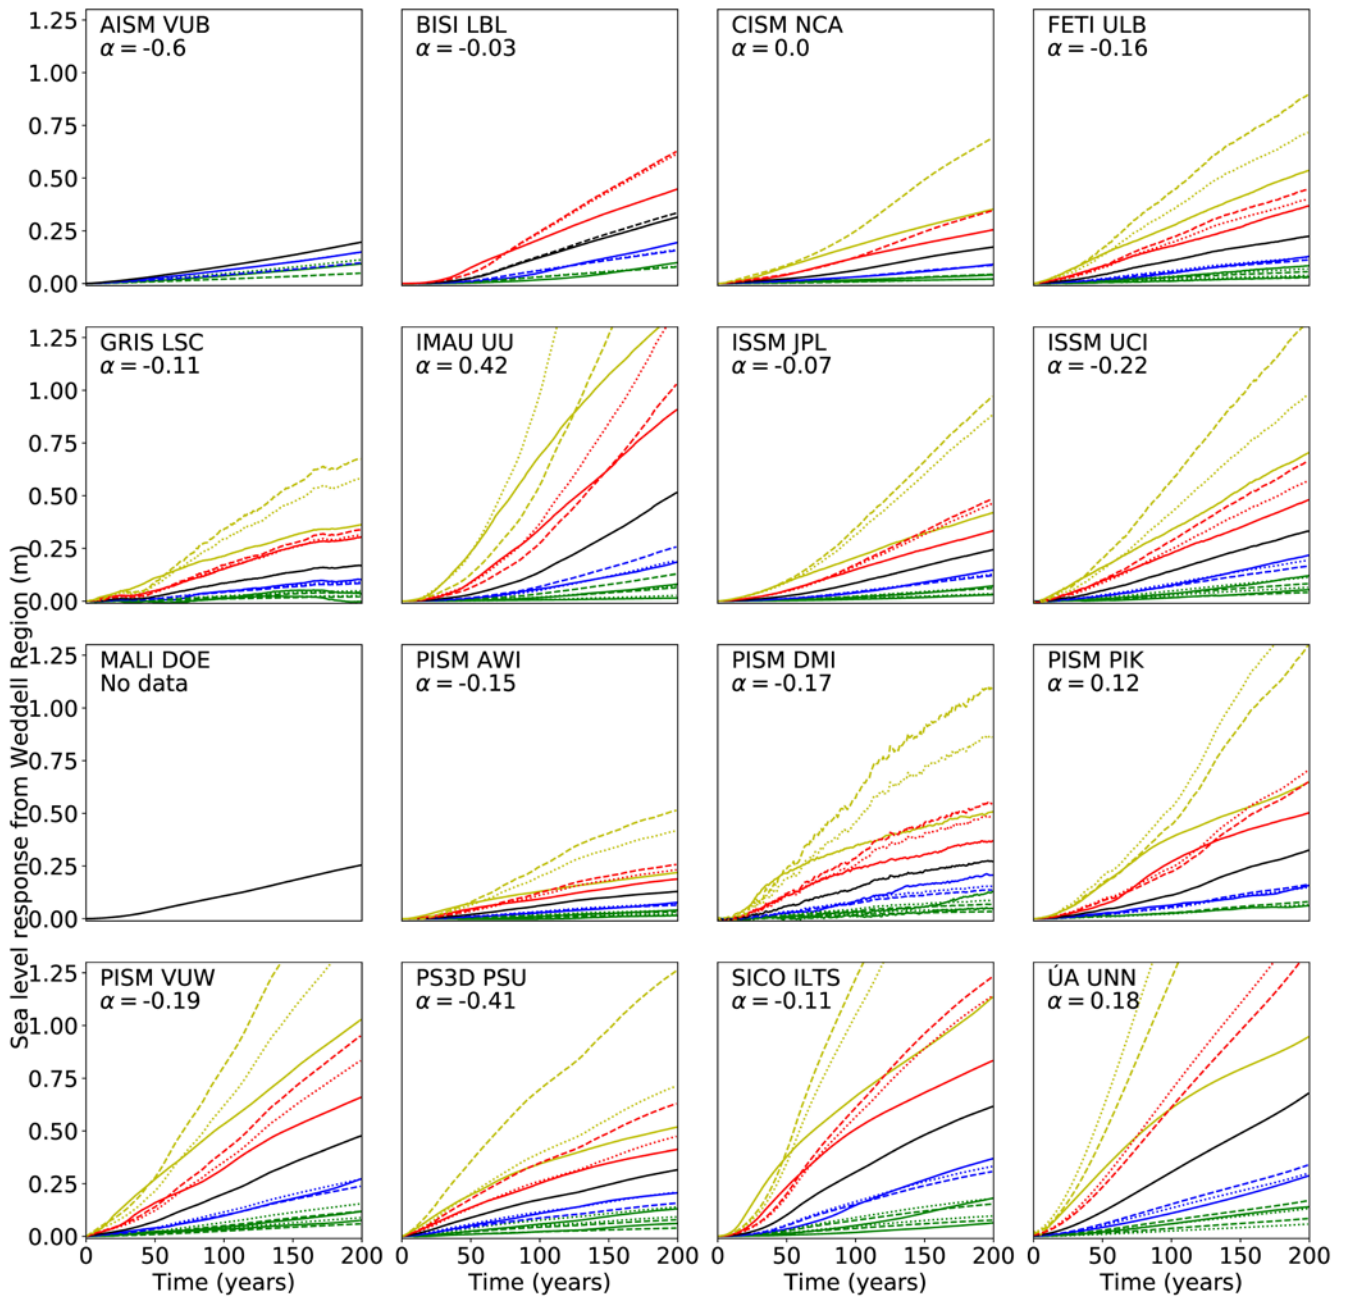

Figure S1d: Linearity check for the Weddell region as in Figure S1a.

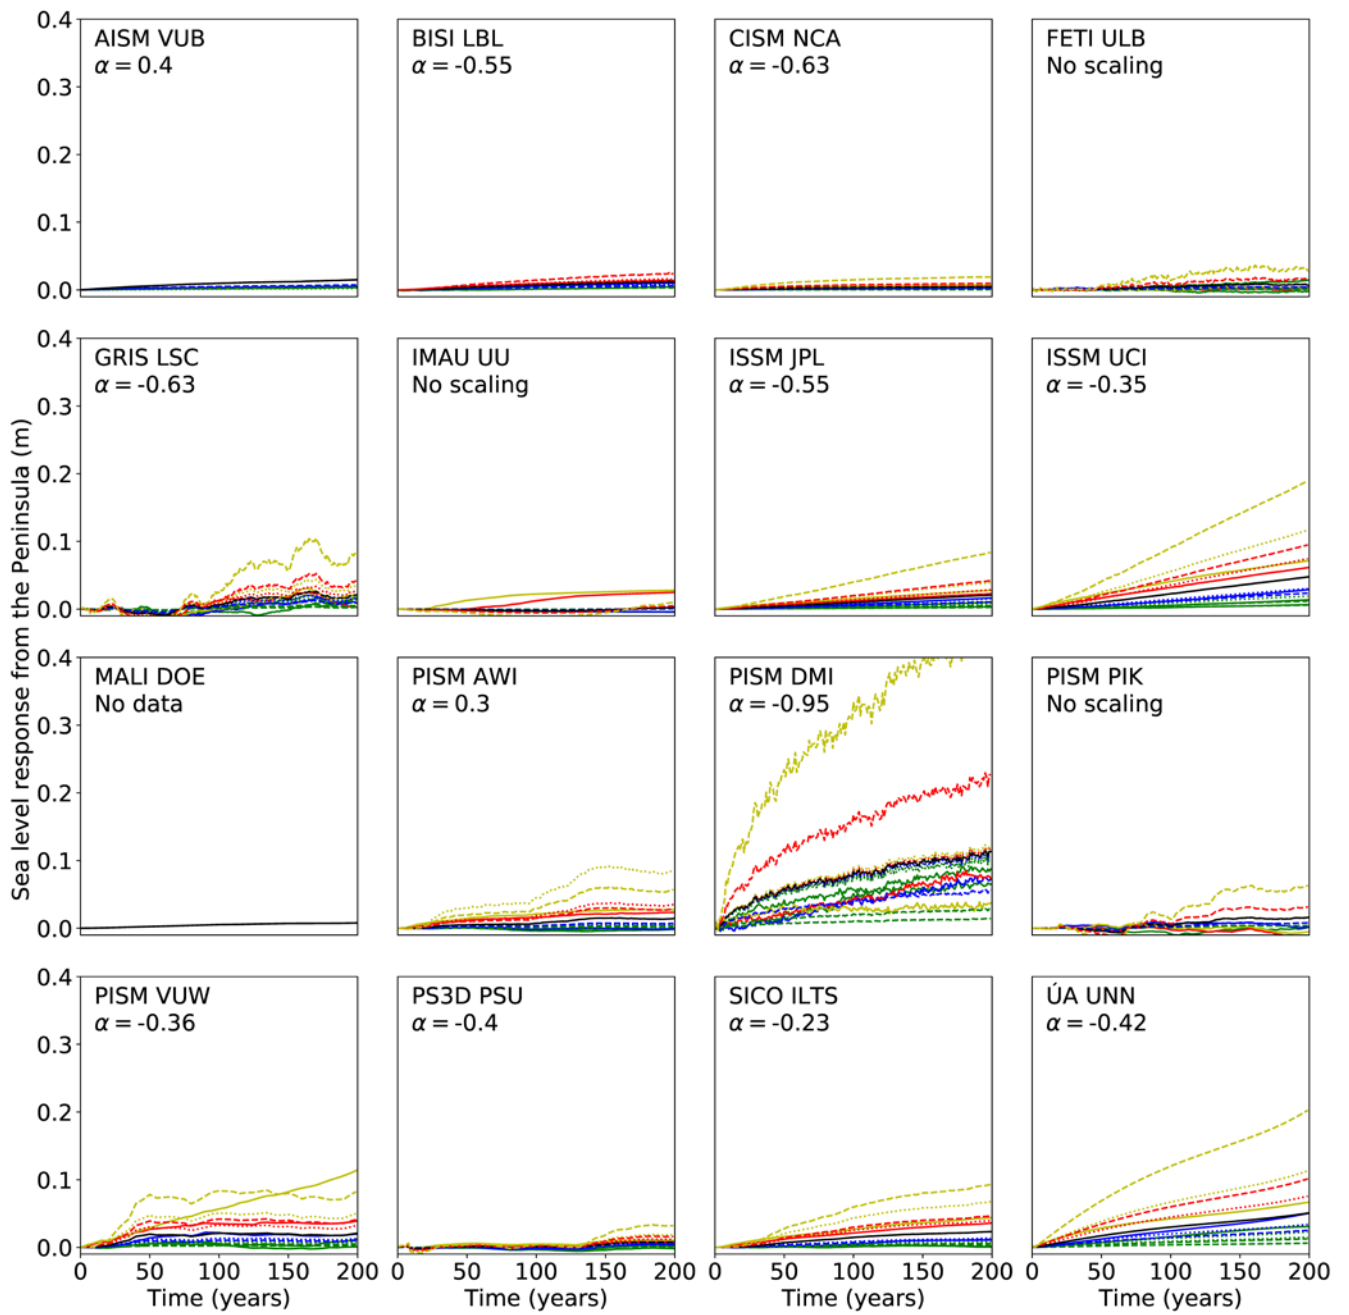

**Figure S1e: Linearity check for the Antarctic Peninsula** as in Figure S1a.
